# Supplementary material for: An analysis of deficiencies in the data of interventional drug trials registered with Clinical Trials Registry - India
Source: Springer Nature journal article supplement (doi:10.1186/s13063-019-3592-0), 2019-08-28
Supplement: MOESM1 [file 17111896]

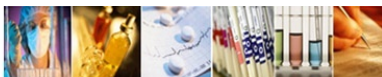

**Additional file 1. A sample CTRI record**

Clinical Trial Details (PDF Generation Date :- Wed, 26 Jun 2019 04:18:33 GMT)

|                                                                                            |                                                                                                                                                                                                               |                                                                                                                                                             |
|--------------------------------------------------------------------------------------------|---------------------------------------------------------------------------------------------------------------------------------------------------------------------------------------------------------------|-------------------------------------------------------------------------------------------------------------------------------------------------------------|
| <b>CTRI Number</b>                                                                         | CTRI/2018/02/011983 [Registered on: 19/02/2018] - <b>Trial Registered Prospectively</b>                                                                                                                       |                                                                                                                                                             |
| <b>Last Modified On</b>                                                                    | 14/01/2019                                                                                                                                                                                                    |                                                                                                                                                             |
| <b>Post Graduate Thesis</b>                                                                | No                                                                                                                                                                                                            |                                                                                                                                                             |
| <b>Type of Trial</b>                                                                       | Interventional                                                                                                                                                                                                |                                                                                                                                                             |
| <b>Type of Study</b>                                                                       | Drug                                                                                                                                                                                                          |                                                                                                                                                             |
| <b>Study Design</b>                                                                        | Randomized, Parallel Group, Placebo Controlled Trial                                                                                                                                                          |                                                                                                                                                             |
| <b>Public Title of Study</b>                                                               | Study of Baricitinib in adult patients with Atopic Dermatitis                                                                                                                                                 |                                                                                                                                                             |
| <b>Scientific Title of Study</b>                                                           | Protocol I4V-MC-JAHL:A Multicenter, Randomized, Double-Blind,Placebo-Controlled, Phase 3 Study to Evaluate the Efficacy and Safety of Baricitinib in Adult Patients with Moderate to Severe Atopic Dermatitis |                                                                                                                                                             |
| <b>Secondary IDs if Any</b>                                                                | <b>Secondary ID</b>                                                                                                                                                                                           | <b>Identifier</b>                                                                                                                                           |
|                                                                                            | Protocol I4V-MC-JAHL dated 29-Jun-2017                                                                                                                                                                        | DCGI                                                                                                                                                        |
| <b>Details of Principal Investigator or overall Trial Coordinator (multi-center study)</b> | <b>Details of Principal Investigator</b>                                                                                                                                                                      |                                                                                                                                                             |
|                                                                                            | <b>Name</b>                                                                                                                                                                                                   | Dr Tarun Puri                                                                                                                                               |
|                                                                                            | <b>Designation</b>                                                                                                                                                                                            | Medical Director                                                                                                                                            |
|                                                                                            | <b>Affiliation</b>                                                                                                                                                                                            | Eli Lilly and Company (India) Pvt. Ltd.                                                                                                                     |
|                                                                                            | <b>Address</b>                                                                                                                                                                                                | Eli Lilly and Company (India) Pvt. Ltd. Plot No - 92, Sec - 32,Institutional Area, Gurgaon - 122001 HARYANA, India<br>Gurgaon<br>HARYANA<br>122001<br>India |
|                                                                                            | <b>Phone</b>                                                                                                                                                                                                  |                                                                                                                                                             |
|                                                                                            | <b>Fax</b>                                                                                                                                                                                                    |                                                                                                                                                             |
|                                                                                            | <b>Email</b>                                                                                                                                                                                                  | puri_tarun@lilly.com                                                                                                                                        |
|                                                                                            | <b>Details Contact Person (Scientific Query)</b>                                                                                                                                                              | <b>Details Contact Person (Scientific Query)</b>                                                                                                            |
| <b>Name</b>                                                                                |                                                                                                                                                                                                               | Dr Tarun Puri                                                                                                                                               |
| <b>Designation</b>                                                                         |                                                                                                                                                                                                               | Medical Director                                                                                                                                            |
| <b>Affiliation</b>                                                                         |                                                                                                                                                                                                               | Eli Lilly and Company (India) Pvt. Ltd.                                                                                                                     |
| <b>Address</b>                                                                             |                                                                                                                                                                                                               | Eli Lilly and Company (India) Pvt. Ltd. Plot No - 92, Sec - 32,Institutional Area, Gurgaon - 122001 HARYANA, India<br>Gurgaon<br>HARYANA<br>122001<br>India |
| <b>Phone</b>                                                                               |                                                                                                                                                                                                               |                                                                                                                                                             |
| <b>Fax</b>                                                                                 |                                                                                                                                                                                                               |                                                                                                                                                             |
| <b>Email</b>                                                                               |                                                                                                                                                                                                               | puri_tarun@lilly.com                                                                                                                                        |
| <b>Details Contact Person (Public Query)</b>                                               |                                                                                                                                                                                                               | <b>Details Contact Person (Public Query)</b>                                                                                                                |
|                                                                                            | <b>Name</b>                                                                                                                                                                                                   | Dr Rajeev Sharan Shrivastava                                                                                                                                |
|                                                                                            | <b>Designation</b>                                                                                                                                                                                            | Associate Director - Clinical Research                                                                                                                      |
|                                                                                            | <b>Affiliation</b>                                                                                                                                                                                            | Eli Lilly and Company (India) Pvt. Ltd.                                                                                                                     |
|                                                                                            | <b>Address</b>                                                                                                                                                                                                | Eli Lilly and Company (India) Pvt. Ltd. Plot No - 92, Sec - 32,Institutional Area, Gurgaon - 122001 HARYANA, India<br>Gurgaon<br>HARYANA<br>122001<br>India |
|                                                                                            |                                                                                                                                                                                                               |                                                                                                                                                             |



|              |                         |
|--------------|-------------------------|
| <b>Phone</b> |                         |
| <b>Fax</b>   |                         |
| <b>Email</b> | shrivastavara@lilly.com |

**Source of Monetary or Material Support**

| Source of Monetary or Material Support                                                     |  |
|--------------------------------------------------------------------------------------------|--|
| > Eli Lilly and Company (India) PVT LTD, Plot No. 92, Sector-32, Gurgaon, Haryana - 122001 |  |

**Primary Sponsor**

| Primary Sponsor Details |                                                                                          |
|-------------------------|------------------------------------------------------------------------------------------|
| <b>Name</b>             | Eli Lilly and Company India Pvt Ltd                                                      |
| <b>Address</b>          | Eli Lilly and Company (India) Pvt Ltd, Plot No. 92, Sector-32, Gurgaon, Haryana - 122001 |
| <b>Type of Sponsor</b>  | Pharmaceutical industry-Global                                                           |

**Details of Secondary Sponsor**

| Name | Address |
|------|---------|
| NIL  | NIL     |

**Countries of Recruitment**

| List of Countries        |
|--------------------------|
| Canada                   |
| Czech Republic           |
| France                   |
| Germany                  |
| India                    |
| Italy                    |
| Japan                    |
| Mexico                   |
| Russian Federation       |
| Taiwan                   |
| United States of America |

**Sites of Study**

| Name of Principal Investigator | Name of Site                                    | Site Address                                                                                                                                                   | Phone/Fax/Email                     |
|--------------------------------|-------------------------------------------------|----------------------------------------------------------------------------------------------------------------------------------------------------------------|-------------------------------------|
| Dr Vinod Kumar Sharma          | All India Institute of Medical Sciences (AIIMS) | Department of Dermatology and Venereology, All India Institute of Medical Sciences (AIIMS), Ansari Nagar East, New Delhi – 110029, India<br>New Delhi<br>DELHI | 9871213543<br>vksiadvl@gmail.com    |
| Dr Bela Jaswantlal Shah        | B.J. Medical College and Civil Hospital         | Department of Medicine, D4, Civil Hospital Campus, Asarwa Ahmedabad, Gujarat - 380 016 India<br>Ahmadabad<br>GUJARAT                                           | 9898059289<br>shah.drbel@gmail.com  |
| Dr Jayaraaman Ammani Murugaiya | Chennai Meenakshi Multispecialty Hospital       | New No. 72, Old No. 149 , Luz Church Road, Myla pore, Chennai - 600 004. Tamil Nadu, INDIA<br>Chennai<br>TAMIL NADU                                            | 9444119274<br>jayaraamana@gmail.com |
| Dr Kiran Vasant Godse          | D .Y. Patil Hospital & Research Centre          | Sectore – 5, Nerul, Navi Mumbai, Maharashtra - 400706 India                                                                                                    | 9322266687<br>drgodse@gmail.com     |

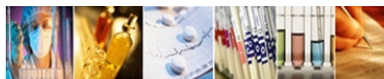

|                               |                                                                    |                                                                                                                                                          |                                             |
|-------------------------------|--------------------------------------------------------------------|----------------------------------------------------------------------------------------------------------------------------------------------------------|---------------------------------------------|
|                               |                                                                    | Mumbai<br>MAHARASHTRA                                                                                                                                    |                                             |
| Dr Gurram Narsimha Rao Netha  | Gandhi Hospital                                                    | Dept of Dermatology,<br>3rd floor, 6-1-34,<br>Musheerabad<br>Secunderabad, Andhra<br>Pradesh 500048, India<br>Hyderabad<br>ANDHRA PRADESH                | 9390032196<br><br>gnrnetha@gmail.com        |
| Dr Yogesh Shashikant Marfatia | Government Medical College & Sir Sayajirao General Hospital (SSGH) | Jail road, Indira Avenue, Sayajiganj, Vadodara Vadodara, Gujarat 390001 India Vadodara GUJARAT                                                           | 9825917442<br><br>ym11256@gmail.com         |
| Dr Pradyumna Prakash Vaidya   | Jehangir Clinical Development Centre                               | Jehangir Hospital Premises, 32, Sasson Road, Near Pune Railway Station, Bund Garden Road, Sangamvadi, Pune, Maharashtra – 411001, India Pune MAHARASHTRA | 9822400964<br><br>drpvaidya@gmail.com       |
| Dr Venkatachalam Konakanchi   | King George Hospital and Andhra Medical College                    | Dept of Dermatology, Maharani Peta, Vizag, Andhra Pradesh – 530002, India Visakhapatnam ANDHRA PRADESH                                                   | 9848398923<br><br>drkvchalam99@gmail.com    |
| Dr T K Sumathy                | M S Ramaiah Medical College & Hospital                             | MSRIT Post, New BEL Road Bangalore, Karnataka 560054 India Bangalore KARNATAKA                                                                           | 9845163009<br><br>tksumathy@gmail.com       |
| Dr Rajeev Agarwal             | M.V. Hospital & Research Centre                                    | 314/30, Mirza Mandi, Chowk, Lucknow – 226003, Uttar Pradesh, India Lucknow UTTAR PRADESH                                                                 | 9415080604<br><br>drrajeeva1@rediffmail.com |
| Dr Hemangi Rajiv Jerajani     | Mahatma Gandhi Mission Medical College                             | MGM Campus, Plot No. 1 & 2, Sector-18, At NH-4 Junction, Mumbai-Pune Express Way, Kamothe, Navi Mumbai, Maharashtra 410209 India Mumbai MAHARASHTRA      | 9820031483<br><br>jerajani@rediffmail.com   |
| Dr Kirti Prakash Shah         | Panchshil Hospital                                                 | 2nd Floor, Ramnagar, Near Sabarmati Police Station Highway, Ahmedabad, Gujarat - 380005 India Ahmadabad GUJARAT                                          | 9825651751<br><br>drkirtipshah@yahoo.in     |
| Dr Parag Gopal Kalyani        | Ruby Hall Clinic                                                   | 40, Sassoon Road                                                                                                                                         | 266455495                                   |



|                               |                                               |                                                                                                                                                  |                                      |
|-------------------------------|-----------------------------------------------|--------------------------------------------------------------------------------------------------------------------------------------------------|--------------------------------------|
|                               |                                               | Pune, Maharashtra -<br>411001 India<br>Pune<br>MAHARASHTRA                                                                                       | parag.kalyani@yahoo.com              |
| Dr Uday Sharadchandra Khopkar | Seth G. S. Medical College & K. E. M Hospital | Department of Dermatology, 2nd floor, Old hospital building, Acharya Donde Marg, Parel Mumbai, Maharashtra 400012 India<br>Mumbai<br>MAHARASHTRA | 9322671959<br>drkhopkar@gmail.com    |
| Dr Rohit Batra                | Sir Gangaram Hospital                         | Department of Dermatology, Rajinder Nagar. New Delhi-110060, India<br>New Delhi<br>DELHI                                                         | 9911300050<br>drrohitbatra@gmail.com |

**Details of Ethics Committee**

| Name of Committee                                                   | Approval Status        | Date of Approval  | Is Independent Ethics Committee? |
|---------------------------------------------------------------------|------------------------|-------------------|----------------------------------|
| Chennai Meenakshi Multispeciality Hospital Ethics Committee         | Submitted/Under Review | No Date Specified | No                               |
| Ethics Committee , Jehangir Clinical Development Centre Pvt. Ltd    | Submitted/Under Review | No Date Specified | No                               |
| Ethics Committee, M.S. Ramaiah Medical College and Hospitals        | Submitted/Under Review | No Date Specified | No                               |
| Ethics Committee, MGM Institute of Health Sciences                  | Submitted/Under Review | No Date Specified | No                               |
| Ethics Committee, Sir Ganga Ram Hospital                            | Submitted/Under Review | No Date Specified | No                               |
| Institute Ethics Committee, All India Institute of Medical Sciences | Approved               | 10/12/2018        | No                               |
| Institutional Ethics Committee for Human Research, Medical College  | Submitted/Under Review | No Date Specified | No                               |
| Institutional Ethics Committee, Dr D Y Patil Medical College        | Approved               | 05/11/2018        | No                               |
| Institutional Ethics Committee, King George Hospital                | Approved               | 22/01/2018        | No                               |
| Institutional Ethics Committee, M.V. Hospital                       | Approved               | 28/10/2018        | No                               |
| Institutional Ethics Committee, Poona Medical Research Foundation   | Submitted/Under Review | No Date Specified | No                               |

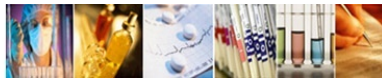

|                                                                                  |                        |                   |    |
|----------------------------------------------------------------------------------|------------------------|-------------------|----|
| Institutional Ethics Committee, Principle office, Gandhi Medical College         | Submitted/Under Review | No Date Specified | No |
| Institutional Ethics Committee-I, Seth G. S. Medical College & K. E. M. Hospital | Submitted/Under Review | No Date Specified | No |
| Panchshil Institutional Ethics Committee                                         | Approved               | 06/02/2018        | No |
| The Institutional Ethics Committee, B J Medical College & Civil Hospital         | Submitted/Under Review | No Date Specified | No |

**Regulatory Clearance Status from DCGI**

| Status            | Date       |
|-------------------|------------|
| Approved/Obtained | 12/02/2018 |

**Health Condition / Problems Studied**

| Health Type | Condition                                                |
|-------------|----------------------------------------------------------|
| Patients    | Adult Patients with Moderate to Severe Atopic Dermatitis |
| Patients    | Atopic dermatitis, unspecified                           |

**Intervention / Comparator Agent**

| Type             | Name                                                   | Details                                                                                                                                                                                                                                                                                                                                                                                                                                                                                                                                                                                              |
|------------------|--------------------------------------------------------|------------------------------------------------------------------------------------------------------------------------------------------------------------------------------------------------------------------------------------------------------------------------------------------------------------------------------------------------------------------------------------------------------------------------------------------------------------------------------------------------------------------------------------------------------------------------------------------------------|
| Intervention     | Baricitinib 1-mg once daily (QD), 2-mg QD, and 4-mg QD | Study I4V-MC-JAHL (JAHL) is a Phase 3, multicenter, randomized, double-blind, placebo-controlled, parallel-group, outpatient study evaluating the efficacy and safety of baricitinib 1-mg once daily (QD), 2-mg QD, and 4-mg QD as compared to placebo. Approximately 600 patients ≥18 years of age who have responded inadequately to or who are intolerant to topical therapy will be randomized at a 2:1:1:1 ratio to receive placebo QD, baricitinib 1-mg QD, baricitinib 2-mg QD, or baricitinib 4-mg QD (240 patients in the placebo group; 120 patients in each baricitinib treatment group). |
| Comparator Agent | Placebo                                                | Patients who meet all criteria for enrollment will be randomized in a 2:1:1:1 ratio (placebo, baricitinib 1-mg; baricitinib 2-mg; baricitinib 4-mg) to double-blind treatment at Visit 2 (Week 0). Randomization will be stratified by geographic region (North America [NA], Europe [EU], Japan [JPN], rest-of-world [ROW]) and disease severity at baseline (IGA 3 vs. 4).                                                                                                                                                                                                                         |

**Inclusion Criteria**

| Inclusion Criteria |               |
|--------------------|---------------|
| Age From           | 18.00 Year(s) |
| Age To             | 60.00 Year(s) |

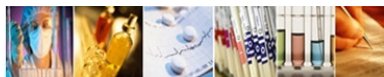

|                |                                                                                                                                                                                                                                                                                                                                                                                                                                                                                                                                                                                                                                                                                                                                                                                                                                                                                                                                                                                                                                                                                                                                                                                                                                                                                                                                                                                                                                                                                                                                                                                                                                                                                                                                                                                                                                                                                                                                                                                                                                                                                                                                                                                                                                                                                                                                                                                                                                                                                                                                                                                                                                                                                                                                                                                                                                                                                                                                                                                                                                                                                                                                                                                                                                                                                                                                                                                                                                                                                                                                                                                                                                 |
|----------------|---------------------------------------------------------------------------------------------------------------------------------------------------------------------------------------------------------------------------------------------------------------------------------------------------------------------------------------------------------------------------------------------------------------------------------------------------------------------------------------------------------------------------------------------------------------------------------------------------------------------------------------------------------------------------------------------------------------------------------------------------------------------------------------------------------------------------------------------------------------------------------------------------------------------------------------------------------------------------------------------------------------------------------------------------------------------------------------------------------------------------------------------------------------------------------------------------------------------------------------------------------------------------------------------------------------------------------------------------------------------------------------------------------------------------------------------------------------------------------------------------------------------------------------------------------------------------------------------------------------------------------------------------------------------------------------------------------------------------------------------------------------------------------------------------------------------------------------------------------------------------------------------------------------------------------------------------------------------------------------------------------------------------------------------------------------------------------------------------------------------------------------------------------------------------------------------------------------------------------------------------------------------------------------------------------------------------------------------------------------------------------------------------------------------------------------------------------------------------------------------------------------------------------------------------------------------------------------------------------------------------------------------------------------------------------------------------------------------------------------------------------------------------------------------------------------------------------------------------------------------------------------------------------------------------------------------------------------------------------------------------------------------------------------------------------------------------------------------------------------------------------------------------------------------------------------------------------------------------------------------------------------------------------------------------------------------------------------------------------------------------------------------------------------------------------------------------------------------------------------------------------------------------------------------------------------------------------------------------------------------------------|
| <b>Gender</b>  | Both                                                                                                                                                                                                                                                                                                                                                                                                                                                                                                                                                                                                                                                                                                                                                                                                                                                                                                                                                                                                                                                                                                                                                                                                                                                                                                                                                                                                                                                                                                                                                                                                                                                                                                                                                                                                                                                                                                                                                                                                                                                                                                                                                                                                                                                                                                                                                                                                                                                                                                                                                                                                                                                                                                                                                                                                                                                                                                                                                                                                                                                                                                                                                                                                                                                                                                                                                                                                                                                                                                                                                                                                                            |
| <b>Details</b> | <p>[1] are at least 18 years of age at the time of informed consent.</p> <p>[2] are able to read, understand, and give documented (electronic or paper signature) informed consent.</p> <p>[3] have a diagnosis of AD at least 12 months prior to screening, as defined by the American Academy of Dermatology: Guidelines of care for the management of AD; Section 1. Diagnosis and assessment of atopic dermatitis</p> <p>[4] have moderate to severe AD, including all of the following:</p> <ul style="list-style-type: none"> <li>a. Eczema Area and Severity Index (EASI) score <math>\geq 16</math> at screening (Visit 1) and at randomization (Visit 2)</li> <li>b. IGA score of <math>\geq 3</math> at screening (Visit 1) and at randomization (Visit 2)</li> <li>c. <math>\geq 10\%</math> of BSA involvement at screening (Visit 1) and at randomization(Visit 2).</li> </ul> <p>[5] have a documented history by a physician and/or investigator of inadequate response to existing topical medications within 6 months preceding screening, or history of intolerance to topical therapy as defined by at least 1 of the following:</p> <ul style="list-style-type: none"> <li>a. inability to achieve good disease control defined as mild disease or better (e.g., IGA <math>\leq 2</math>) after use of at least a medium potency TCS for at least 4 weeks, or for the maximum duration recommended by the product prescribing information (e.g., 14 days for super-potent TCS), whichever is shorter. Topical corticosteroids may be used with or without TCNIs.</li> <li>b. Patients who failed systemic therapies intended to treat AD within 6 months preceding screening, such as cyclosporine, methotrexate, azathioprine, mycophenolate mofetil will also be considered as a surrogate for having inadequate response to topical therapy.</li> <li>c. documented history of clinically significant adverse reactions with the use of TCS such as skin atrophy, allergic reactions, systemic effects that in the opinion of the investigator outweigh the benefits of retreatment.</li> </ul> <p>[6] agree to discontinue use of the following excluded medications/treatments for at least 4 weeks prior to randomization (Visit 2) and throughout the study:</p> <ul style="list-style-type: none"> <li>a. systemic corticosteroids and leukotriene inhibitors</li> <li>b. systemic immunomodulators, including, but not limited to, cyclosporine, methotrexate, mycophenolate mofetil, and azathioprine</li> <li>c. sedating antihistamines, including, but not limited to, alimemazine, chlorphenamine, clemastine, cyproheptadine, diphenhydramine, hydroxyzine, ketotifen, and promethazine</li> </ul> <p>Note: Patients may use newer, less sedating antihistamines (e.g., fexofenadine, loratadine, cetirizine).</p> <ul style="list-style-type: none"> <li>d. any other systemic therapy used to treat AD or symptoms of AD (approved or off-label use)</li> <li>e. phototherapy, includes therapeutic phototherapy (psoralen plus ultraviolet-A, ultraviolet-B), excimer laser as well as self-treatment with tanning beds.</li> </ul> <p>[7] agree to discontinue use of the following excluded medications for at least 2 weeks prior to randomization (Visit 2) and throughout the study:</p> <ul style="list-style-type: none"> <li>a. TCS or topical immune modulators (e.g., tacrolimus or pimecrolimus)</li> <li>b. Topical phosphodiesterase type 4 (PDE-4) inhibitor (crisaborole)</li> <li>c. Topical JAK inhibitor (e.g., tofacitinib or ruxolitinib) and/or any other</li> </ul> |



|  |                                                                                                                                                                                                                                                                                                                                                                                                                                                                                                                                                                                                                                                                                                                                                                                                                                                                                                                                                                                                                                                                                                |
|--|------------------------------------------------------------------------------------------------------------------------------------------------------------------------------------------------------------------------------------------------------------------------------------------------------------------------------------------------------------------------------------------------------------------------------------------------------------------------------------------------------------------------------------------------------------------------------------------------------------------------------------------------------------------------------------------------------------------------------------------------------------------------------------------------------------------------------------------------------------------------------------------------------------------------------------------------------------------------------------------------------------------------------------------------------------------------------------------------|
|  | <p>investigative topical treatments.</p> <p>[8] have applied emollients daily for at least 14 days prior to randomization and agree to use emollient daily throughout the treatment period.</p> <p>[9] Patients who are receiving chronic treatments to improve sleep should be on a stable dose for at least 2 weeks prior to screening as determined by the investigator. Sedating antihistamines (see above) are not permitted.</p> <p>[10] are male or nonpregnant, nonbreastfeeding female patients, except:</p> <p>a. Male patients must agree to use 2 forms of birth control (1 must be highly effective, see below) while engaging in sexual intercourse with female partners of childbearing potential while enrolled in the study and for at least 4 weeks following the last dose of investigational product.</p> <p>b. Female patients of childbearing potential must agree to use 2 forms of birth control, when engaging in sexual intercourse with a male partner while enrolled in the study and for at least 4 weeks following the last dose of investigational product.</p> |
|--|------------------------------------------------------------------------------------------------------------------------------------------------------------------------------------------------------------------------------------------------------------------------------------------------------------------------------------------------------------------------------------------------------------------------------------------------------------------------------------------------------------------------------------------------------------------------------------------------------------------------------------------------------------------------------------------------------------------------------------------------------------------------------------------------------------------------------------------------------------------------------------------------------------------------------------------------------------------------------------------------------------------------------------------------------------------------------------------------|

**Exclusion Criteria**

| Exclusion Criteria |                                                                                                                                                                                                                                                                                                                                                                                                                                                                                                                                                                                                                                                                                                                                                                                                                                                                                                                                                                                                                                                                                                                                                                                                                                                                                                                                                                                                                                                                                                                                                                                                                                                                                                                                                                                                                                                                                                                                                                               |
|--------------------|-------------------------------------------------------------------------------------------------------------------------------------------------------------------------------------------------------------------------------------------------------------------------------------------------------------------------------------------------------------------------------------------------------------------------------------------------------------------------------------------------------------------------------------------------------------------------------------------------------------------------------------------------------------------------------------------------------------------------------------------------------------------------------------------------------------------------------------------------------------------------------------------------------------------------------------------------------------------------------------------------------------------------------------------------------------------------------------------------------------------------------------------------------------------------------------------------------------------------------------------------------------------------------------------------------------------------------------------------------------------------------------------------------------------------------------------------------------------------------------------------------------------------------------------------------------------------------------------------------------------------------------------------------------------------------------------------------------------------------------------------------------------------------------------------------------------------------------------------------------------------------------------------------------------------------------------------------------------------------|
| <b>Details</b>     | <p>[1] are currently experiencing or have a history of other concomitant skin conditions (e.g., psoriasis or lupus erythematosus) that would interfere with evaluations of the effect of study medication on AD.</p> <p>[2] patients who, in the opinion of the investigator, are currently experiencing or have a history of erythrodermic, refractory, or unstable skin disease that requires frequent hospitalizations and/or intravenous treatment for skin infections that may interfere with participation in the study.</p> <p>[3] a history of eczema herpeticum within 12 months prior to screening.</p> <p>[4] a history of 2 or more episodes of eczema herpeticum in the past.</p> <p>[5] patients who are currently experiencing a skin infection that requires treatment, or is currently being treated, with topical or systemic antibiotics.</p> <p>[6] have any serious concomitant illness that is anticipated to require the use of systemic corticosteroids or otherwise interfere with study participation or require active frequent monitoring (e.g., unstable chronic asthma).</p> <p>[7] have been treated with the following therapies:</p> <p>a. monoclonal antibody (e.g., ustekinumab, omalizumab, dupilumab) for less than 5 half-lives prior to randomization.</p> <p>b. received prior treatment with any oral JAK inhibitor (e.g., tofacitinib, ruxolitinib)</p> <p>c. received any parenteral corticosteroid administered by intramuscular or intravenous injection within 2 weeks prior to study entry (Visit 1) or within 6 weeks prior to planned randomization (Visit 2) or are anticipated to require parenteral injection of corticosteroids during the study.</p> <p>d. have had an intra-articular corticosteroid injection within 2 weeks prior to study entry (Visit 1) or within 6 weeks prior to planned randomization (Visit 2).</p> <p>[8] are largely or wholly incapacitated permitting little or no self-care, such as</p> |

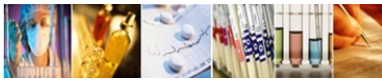

being bedridden.

[9] have uncontrolled arterial hypertension characterized by a repeated systolic blood pressure >160 mm Hg or diastolic blood pressure >100 mm Hg in a seated position.

[10] have had any major surgery within 8 weeks prior to screening or will require major surgery during the study that, in the opinion of the investigator in consultation with Lilly or its designee, would pose an unacceptable risk to the patient.

[11] are immunocompromised and, in the opinion of the investigator, at an unacceptable risk for participating in the study.

[12] have experienced any of the following within 12 weeks of screening: venous thromboembolic event (VTE), myocardial infarction (MI), unstable ischemic heart disease, stroke, or New York Heart Association Stage III/IV heart failure.

[13] have a history of recurrent (? 2) VTE or are considered at high risk of VTE as deemed by the investigator.

[14] have a history or presence of cardiovascular, respiratory, hepatic, gastrointestinal, endocrine, hematological, neurological, or neuropsychiatric disorders or any other serious and/or unstable illness that, in the opinion of the investigator, could constitute an unacceptable risk when taking investigational product or interfere with the interpretation of data.

[15] have a history of lymphoproliferative disease; or have signs or symptoms suggestive of possible lymphoproliferative disease, including lymphadenopathy or splenomegaly; or have active primary or recurrent malignant disease; or have been in remission from clinically significant malignancy for less than 5 years.

a. Patients with cervical carcinoma in situ that has been resected with no evidence of recurrence or metastatic disease for at least 3 years may participate in the study.

b. Patients with basal cell or squamous epithelial skin cancers that have been completely resected with no evidence of recurrence for at least 3 years may participate in the study.

[16] have a current or recent clinically serious viral, bacterial, fungal, or parasitic infection, including but not limited to the following:

a. symptomatic herpes zoster infection within 12 weeks prior to screening.

b. a history of disseminated/complicated herpes zoster (e.g., multidermatomal involvement, ophthalmic zoster, CNS involvement, or post-herpetic neuralgia).

c. symptomatic herpes simplex at the time of randomization.

d. active or chronic viral infection from hepatitis B virus (HBV), hepatitis C virus (HCV), or human immunodeficiency virus (HIV).

e. household contact with a person with active tuberculosis (TB) and





did not receive appropriate and documented prophylaxis for TB.

f. evidence of active TB or have previously had evidence of active TB and did not receive appropriate and documented treatment.

g. clinically serious infection or received intravenous antibiotics for an infection, within the past 4 weeks of randomization.

h. any other active or recent infection within 4 weeks of randomization that, in the opinion of the investigator, would pose an unacceptable risk to the patient if participating in the study.

[17] have been exposed to a live vaccine within 12 weeks prior to planned randomization or are expected to need/receive a live vaccine during the course of the study (with the exception of herpes zoster vaccination).

[18] have a history of chronic alcohol abuse, IV drug abuse, or other illicit drug abuse within the 2 years prior to screening.

[19] presence of significant uncontrolled neuropsychiatric disorder, are clinically judged by the investigator to be at risk for suicide, or have a "yes" answer to any of the following:

a. Question 4 (Active Suicidal Ideation with Some Intent to Act, Without Specific Plan) on the "Suicidal Ideation" portion of the Columbia Suicide Severity Rating Scale (C-SSRS) or

b. Question 5 (Active Suicidal Ideation with Specific Plan and Intent) on the "Suicidal Ideation" portion of the C-SSRS or

c. Any of the suicide-related behaviors (actual attempt, interrupted attempt, aborted attempt, preparatory act or behavior) on the "Suicidal Behavior" portion of the C-SSRS; and the ideation or behavior occurred within 2 months prior to Visit 1.

[20] have donated more than a single unit of blood within 4 weeks prior to screening or intend to donate blood during the course of the study.

[21] are unable or unwilling to make themselves available for the duration of the study and/or are unwilling to follow study restrictions/procedures, including use of data collection devices.

[22] are currently enrolled in any other clinical trial involving an investigational product or any other type of medical research judged not to be scientifically or medically compatible with this study.

[23] have participated within the last 30 days in a clinical study involving an investigational product. If the previous investigational product has a long half-life (2 weeks or longer), at least 3 months or 5 half-lives (whichever is longer) should have passed.

[24] have previously been randomized in this study or any other study investigating baricitinib.

[25] are investigator site personnel directly affiliated with this study and/or their immediate families. Immediate family is defined as a spouse, parent, child, or sibling, whether biological or legally adopted.

[26] are Lilly or Incyte employees or their designee.



|                                             |                                                                                                                                                                                                                                                                                                                                                                                                                                                                                                                                                                                                                                                                                                                                                                                                                                                                                                                                                                                                                                                                                                                                                                                                                                                                                                                      |                                                                                                                                                                                                                                                                          |
|---------------------------------------------|----------------------------------------------------------------------------------------------------------------------------------------------------------------------------------------------------------------------------------------------------------------------------------------------------------------------------------------------------------------------------------------------------------------------------------------------------------------------------------------------------------------------------------------------------------------------------------------------------------------------------------------------------------------------------------------------------------------------------------------------------------------------------------------------------------------------------------------------------------------------------------------------------------------------------------------------------------------------------------------------------------------------------------------------------------------------------------------------------------------------------------------------------------------------------------------------------------------------------------------------------------------------------------------------------------------------|--------------------------------------------------------------------------------------------------------------------------------------------------------------------------------------------------------------------------------------------------------------------------|
| <b>Method of Generating Random Sequence</b> | Stratified randomization                                                                                                                                                                                                                                                                                                                                                                                                                                                                                                                                                                                                                                                                                                                                                                                                                                                                                                                                                                                                                                                                                                                                                                                                                                                                                             |                                                                                                                                                                                                                                                                          |
| <b>Method of Concealment</b>                | Centralized                                                                                                                                                                                                                                                                                                                                                                                                                                                                                                                                                                                                                                                                                                                                                                                                                                                                                                                                                                                                                                                                                                                                                                                                                                                                                                          |                                                                                                                                                                                                                                                                          |
| <b>Blinding/Masking</b>                     | Participant and Investigator Blinded                                                                                                                                                                                                                                                                                                                                                                                                                                                                                                                                                                                                                                                                                                                                                                                                                                                                                                                                                                                                                                                                                                                                                                                                                                                                                 |                                                                                                                                                                                                                                                                          |
| <b>Primary Outcome</b>                      | <b>Outcome</b>                                                                                                                                                                                                                                                                                                                                                                                                                                                                                                                                                                                                                                                                                                                                                                                                                                                                                                                                                                                                                                                                                                                                                                                                                                                                                                       | <b>Timepoints</b>                                                                                                                                                                                                                                                        |
|                                             | To test the hypothesis that baricitinib 4-mg QD is superior to placebo in the treatment of patients with moderate to severe AD.                                                                                                                                                                                                                                                                                                                                                                                                                                                                                                                                                                                                                                                                                                                                                                                                                                                                                                                                                                                                                                                                                                                                                                                      | Proportion of patients achieving IGA of 0 or 1 with a ?2-point improvement at Week 16.                                                                                                                                                                                   |
| <b>Secondary Outcome</b>                    | <b>Outcome</b>                                                                                                                                                                                                                                                                                                                                                                                                                                                                                                                                                                                                                                                                                                                                                                                                                                                                                                                                                                                                                                                                                                                                                                                                                                                                                                       | <b>Timepoints</b>                                                                                                                                                                                                                                                        |
|                                             | To test the hypothesis that baricitinib 2-mg QD or baricitinib 1-mg QD is superior to placebo in the treatment of patients with moderate to severe AD                                                                                                                                                                                                                                                                                                                                                                                                                                                                                                                                                                                                                                                                                                                                                                                                                                                                                                                                                                                                                                                                                                                                                                | Proportion of patients achieving IGA of 0 or 1 with a ?2-point improvement at Week 16.                                                                                                                                                                                   |
|                                             | To compare the efficacy of baricitinib 1-mg QD, 2-mg QD, or 4-mg QD to placebo in AD during the 16-week double-blind placebo-controlled treatment period as measured by improvement in signs and symptoms of AD.                                                                                                                                                                                                                                                                                                                                                                                                                                                                                                                                                                                                                                                                                                                                                                                                                                                                                                                                                                                                                                                                                                     | 1. Proportion of patients achieving EASI75 at 16 weeks<br>2. Proportion of patients achieving EASI90 at 16 weeks<br>3. Percent change from baseline in EASI score at 16 weeks.<br>4. Proportion of patients achieving SCORAD75 at 16 weeks.                              |
|                                             | To compare the efficacy of baricitinib 1-mg QD, 2-mg QD, or 4-mg QD to placebo in AD during the 16-week double-blind placebo-controlled treatment period as assessed by patient-reported outcome measures.                                                                                                                                                                                                                                                                                                                                                                                                                                                                                                                                                                                                                                                                                                                                                                                                                                                                                                                                                                                                                                                                                                           | 1. Proportions of patients achieving a 4-point improvement in Itch NRS at 1 week, 2 weeks, 4 weeks, and 16 weeks<br>2. Mean change from baseline in the score of Item 2 of the ADSS at 1 week and 16 weeks<br>3. Mean change from baseline in Skin Pain NRS at 16 weeks. |
| <b>Target Sample Size</b>                   | <b>Total Sample Size=600</b><br><b>Sample Size from India=60</b><br><b>Final Enrollment numbers achieved (Total)=Applicable only for Completed/Terminated trials</b><br><b>Final Enrollment numbers achieved (India)=Applicable only for Completed/Terminated trials</b>                                                                                                                                                                                                                                                                                                                                                                                                                                                                                                                                                                                                                                                                                                                                                                                                                                                                                                                                                                                                                                             |                                                                                                                                                                                                                                                                          |
| <b>Phase of Trial</b>                       | Phase 3                                                                                                                                                                                                                                                                                                                                                                                                                                                                                                                                                                                                                                                                                                                                                                                                                                                                                                                                                                                                                                                                                                                                                                                                                                                                                                              |                                                                                                                                                                                                                                                                          |
| <b>Date of First Enrollment (India)</b>     | 15/03/2018                                                                                                                                                                                                                                                                                                                                                                                                                                                                                                                                                                                                                                                                                                                                                                                                                                                                                                                                                                                                                                                                                                                                                                                                                                                                                                           |                                                                                                                                                                                                                                                                          |
| <b>Date of First Enrollment (Global)</b>    | 23/11/2017                                                                                                                                                                                                                                                                                                                                                                                                                                                                                                                                                                                                                                                                                                                                                                                                                                                                                                                                                                                                                                                                                                                                                                                                                                                                                                           |                                                                                                                                                                                                                                                                          |
| <b>Estimated Duration of Trial</b>          | <b>Years=1</b><br><b>Months=6</b><br><b>Days=0</b>                                                                                                                                                                                                                                                                                                                                                                                                                                                                                                                                                                                                                                                                                                                                                                                                                                                                                                                                                                                                                                                                                                                                                                                                                                                                   |                                                                                                                                                                                                                                                                          |
| <b>Recruitment Status of Trial (Global)</b> | Open to Recruitment                                                                                                                                                                                                                                                                                                                                                                                                                                                                                                                                                                                                                                                                                                                                                                                                                                                                                                                                                                                                                                                                                                                                                                                                                                                                                                  |                                                                                                                                                                                                                                                                          |
| <b>Recruitment Status of Trial (India)</b>  | Open to Recruitment                                                                                                                                                                                                                                                                                                                                                                                                                                                                                                                                                                                                                                                                                                                                                                                                                                                                                                                                                                                                                                                                                                                                                                                                                                                                                                  |                                                                                                                                                                                                                                                                          |
| <b>Publication Details</b>                  | Nomura and Kabashima 2015 Genovese et al. 2016; Dougados et al. 2017; Fleischmann et al. 2017; Taylor et al. 2017 Papp et al. 2016);                                                                                                                                                                                                                                                                                                                                                                                                                                                                                                                                                                                                                                                                                                                                                                                                                                                                                                                                                                                                                                                                                                                                                                                 |                                                                                                                                                                                                                                                                          |
| <b>Brief Summary</b>                        | <p>Atopic dermatitis (AD) is a pruritic, chronic or chronically relapsing, highly symptomatic, inflammatory skin disease characterized by excessive T cell activation leading to significant skin infiltration by T cells and dendritic cells (Scheer 2009). Prevention is varied, but includes skin moisturization and protection, with avoidance of allergens and subsequent skin irritation. The course of disease includes relapses of varying duration and severity.</p> <p>Baricitinib is an orally available, selective Janus kinase (JAK) inhibitor with potency and selectivity for JAK1 and JAK2 and low potency for JAK3 or tyrosine kinase 2 (TYK2) (Feldman et al. 2010). The pathogenesis of AD is thought to be modulated through Th17-related lymphocytes (Th17), interleukin (IL)-17, IL-1, IL-21, and IL-23, many of which activate receptors with downstream signaling through intracellular JAK1/JAK2/TYK2 (Nomura and Kabashima 2015). This activity profile suggests that baricitinib would inhibit cytokines involved in AD pathogenesis.</p> <p>Clinical studies have established that baricitinib is effective in addressing noninflammatory disease involving the joints, labors, and skin. Baricitinib was effective at reducing redness and itchy joints in patients with rheumatoid</p> |                                                                                                                                                                                                                                                                          |



selective (Garcera et al. 2016; Dingales et al. 2017; Elshikhouni et al. 2017; Taylor et al. 2017), was effective at reducing disease severity in patients with moderate to severe plaque psoriasis (Papp et al. 2016), was effective at reducing the urinary albumin-to-creatinine ratio in patients with diabetic kidney disease (Clark et al. 2015), and in a recently completed Phase 2 study (NCT02488882) was effective at reducing disease severity in patients with moderate to severe ASD. The mechanism of action, combined with documentation of clinical benefit in inflammatory diseases involving joints, kidneys, and skin, provides the rationale for evaluating baricitinib in moderate to severe ASD.
