# Supplementary material for: An analysis of deficiencies in the data of interventional drug trials registered with Clinical Trials Registry - India
Source: Trials. 2019 Aug 28;20:535. doi: 10.1186/s13063-019-3592-0 (PMC6712861; doi:10.1186/s13063-019-3592-0)
Supplement: Supplementary file 4 — The schema of the SQLite database. (XLS 13 kb) [file 13063_2019_3592_MOESM4_ESM.xls]

## Sheet: Table contents from SQL database
Additional file 4. The schema of the SQLite database
Table Number	Main table name	Field names from CTRI
1	BasicDetails	ctri_number
		primarykey
		status_of_reg
		year_of_reg
		last_modified_on
		post_graduate_thesis
		type_of_trial
		type_of_study
		study_design
		public_title_of_study
		scientific_title_of_study
		secondary_id
		identifier
		source_of_monetary
		countries_of_recruitment
		regulatory_clearance_status
		phase_of_trial
		date_of_first_enrollment_india
		date_of_study_completion_india
		date_of_first_enrollment_global
		date_of_study_completion_global
		recruitment_status_of_trial_global
		recruitment_status_of_trial_india
		noofsites
		noofethicalcommittees
		final_enrollment_numbers_total
		final_enrollment_numbers_india
		total_sample_size
		sample_size_from_india
		method_of_generating_random_sequence
		method_of_concealment
		blinding_masking
		primary_outcome_details
		primary_outcome_timeline
		secondary_outcome_details
		secondary_outcome_timeline
		brief_summary
2	ContactPublicQuery	ctri_number
		primarykey
		name
		designation
		email
		fax
		phone
		address
		city
		state
		pin
		country
		affiliation
3	ContactScientificQuery	ctri_number
		primarykey
		name
		designation
		email
		fax
		phone
		address
		city
		state
		pin
		country
		affiliation
4	PrincipalInvestigatorDetails	ctri_number
		primarykey
		name
		designation
		email
		fax
		phone
		address
		city
		state
		pin
		country
		affiliation
5	SitesOfStudy	ctri_number
		primarykey
		site
		address
		state
		Name
		city
6	EthicalCommittee	ctri_number
		primarykey
		status
		Name
7	PrimarySponsor	ctri_number
		primarykey
		name
		typeofsponsor
		address
8	HealthCondition	ctri_number
		primarykey
		health_type
		condition
9	InclusionExclusion	ctri_number
		primarykey
		inclusion_age_from
		inclusion_age_to
		inclusion_gender
		inclusion_details
		exclusion
