# Supplementary material for: An analysis of deficiencies in the data of interventional drug trials registered with Clinical Trials Registry - India
Source: Trials. 2019 Aug 28;20:535. doi: 10.1186/s13063-019-3592-0 (PMC6712861; doi:10.1186/s13063-019-3592-0)
Supplement: Supplementary file 6 — The percentage of trials with errors, in 3-year time periods, for the several categories of errors. a The percentage of trials with errors, in 3-year time periods, for the following categories of errors: (i) Type of Study: Large number of categories, (ii) Errors in determining the unambiguously Indian trials, (iii) Errors in determining the unambiguously Multinational trials, (iv) Indian trials: Interventional cases with Phase listed as PMS, (v) Redefined Indian trials: Type of Trial was PMS, but Phase of Trial was Phase 4, and (vi) Redefined Indian trials: Type of Trial was BA/BE, but Phase was 1, 1/2, 2, 2/3, 3, 3/4, or 4. Columns of data using redefined datasets are shaded. b The percentage of trials with errors, in 3-year time periods, for the following categories of errors: (i) Indian trials: Incorrect listing of cities, (ii) Multinational trials: Incorrect listing of cities, (iii) Indian trials: PI names listed as null, (iv) Multinational trials: PI names listed as null, (v) Redefined Indian trials: Type of Study was NA, but Phase was 1, 1/2, 2, 2/3, 3, 3/4, or 4, and (vi) Indian trials: Primary sponsor name “nil”. Columns of data using redefined datasets are shaded. c The percentage of trials with errors, in 3-year time periods, for the following categories of errors: (i) Indian trials: State of trial site missing, (ii) Multinational trials: State of trial site missing, (iii) Indian trials: More ethics committees than trial sites, and (iv) Multinational trials: More ethics committees than trial sites. (XLS 16 kb) [file 13063_2019_3592_MOESM6_ESM.xls]

## Sheet: Error rates
Additional file 6. The percentage of trials with errors, in four 3-year time periods, for the several categories of errors.
Additional file 6a. Error rates: (i) for the Type of Study: Large number of categories* (ii) in determining the unambiguously Indian trials (iii) in determining the unambiguously Multinational trials (iv) for the Indian trials: Interventional cases with Phase listed as PMS (v) for the redefined Indian trials: Type of Trial was PMS, but Phase of Trial was Phase 4 and (vi) for the redefined Indian …
	Type of Study: Large number of categories		Errors in determining the unambiguously Indian trials		Errors in determining the unambiguously Multinational trials		Indian trials: Interventional cases with Phase listed as PMS		Redefined Indian trials: Type of Trial was PMS, but Phase of Trial was Phase 4		Redefined Indian trials: Type of Trial was BA/BE but Phase of trial was 1, 1/2, 2, 2/3, 3, 3/4 or 4
Time period 2007–2009	6.51779		63.1016		9.17431		0		100		83.3333
Time period 2010–2012	19.3088		23.8579		5.11945		0.729927		33.33		19.6429
Time period 2013–2015	25.2426		4.4484		0.943396		4.22535		22.5		6.48148
Time period 2016–2018	48.9308		3.0137		3.78788		4.56554		37.93		13.6986
Comment on error rates over time	Increased over 7-fold from time period 1 to 4		Decreased 21-fold from time period 1 to 4		Decreased 10-fold from time period 1 to 3, but then increased again		Increased from 0 to almost 5%		Decreased over 4-fold, but then almost doubled		Decreased 13-fold, but then doubled from time period three to four.
Name of Additional File	Additional file 7		Additional file 9		Additional file 10		Additional file 12		Additional file 13		Additional file 13
Relevant panel of Fig 2	Fig 2a		Fig 2a		Fig 2a		Fig 2a		Fig 2b		Fig 2b
Additional file 6b. Error rates for (i) Indian trials: Incorrect listing of cities (ii) Multinational trials: Incorrect listing of cities (iii) Indian trials: PI names listed as null (iv) Multinational trials: PI names listed as null (v) Redefined Indian trials: Type of Study was NA but Phase was 1, 1/2, 2, 2/3, 3, 3/4 or 4 and (vi) Indian trials: Primary sponsor name ‘NIL’. Columns of data using…
	Indian trials: Incorrect listing of cities		Multinational trials: Incorrect listing of cities		Indian trials: PI names listed as null		Multinational trials: PI names listed as null		Redefined Indian trials: Type of Study was NA but Phase of trial was 1, 1/2, 2, 2/3, 3, 3/4 or 4		Indian trials: Primary sponsor name ‘NIL’
Time period 2007–2009	0		0.340522		10.2941		54.0816		87.5		1.47059
Time period 2010–2012	2.48555		1.33956		9.00243		42.0863		20.6897		2.6764
Time period 2013–2015	2.84796		3.33333		4.42656		32.0388		6.19469		1.81087
Time period 2016–2018	5.2987		1.28205		3.53461		33.0709		13.4146		1.03093
Comment on error rates over time	Increased from 0 to 5% from time period one to four		Increased 10-fold, but then decreased almost 3-fold		Decreased 3-fold from time period 1 to 4		Decreased 2-fold from time period 1 to time period 3, with a plateauing in segment 4		Decreased 14-fold, but then doubled		Almost doubled, but then dropped to 40%
Name of Additional File	Additional file 13		Additional file 13		Additional file 14		Additional file 14		Additional file 14		Additional file 14
Relevant panel of Fig 2	Fig 2b		Fig 2b		Fig 2c		Fig 2c		Fig 2c		Fig 2c
Additional file 6c. Error rates: (i) Indian trials: State of trial site missing (ii) Multinational trials: State of trial site missing (iii) Indian trials: More ethics committees than trial sites and (iv) Multinational trials: More ethics committees than trial sites.
	Indian trials: State of trial site missing		Multinational trials: State of trial site missing		Indian trials: More ethics committees than trial sites		Multinational trials: More ethics committees than trial sites
Time period 2007–2009	5.85366		12.4858		9.35961		7.36479
Time period 2010–2012	2.13873		3.27103		9.89863		6.62043
Time period 2013–2015	0.229674		1.26126		4.64337		7.07804
Time period 2016–2018	0.0519481		0.134953		9.50434		3.44595
Comment on error rates over time	Dropped from a low initial error rate to almost nothing		Dropped from a modest initial error rate to almost nothing		The error rate was close to 10% in all time periods except the third, when it halved.		The error rate was around 7% in all time periods except the last, when it halved.
Name of Additional File	Additional file 14		Additional file 14		Additional file 15		Additional file 15
Relevant panel of Fig 2	Fig 2c		Fig 2c		Fig 2a		Fig 2a
* Although this is not strictly an ‘error rate’, we have labelled it as such, since, for all other problems, we have quantified the error rates.
